# Supplementary material
Source: PubMed Central journal article supplement (PMC10247520)
Supplement: NIHMS1891351-supplement-3.pdf [file NIHMS1891351-supplement-3.pdf]

## Supplemental Information

# Computational modeling and prediction of deletion mutants

Hope Woods<sup>1,2</sup>, Dominic L. Schiano<sup>1,3</sup>, Jonathan I. Aguirre<sup>3</sup>, Kaitlyn V. Ledwitch<sup>1,3</sup>, Eli F. McDonald<sup>1,3</sup>, Markus Voehler<sup>1,3</sup>, Jens Meiler<sup>1,3,4\*.#</sup> and Clara T. Schoeder<sup>1,3,4\*.#,†</sup>

<sup>1</sup> Center of Structural Biology, Vanderbilt University, Nashville, Tennessee, TN 37235, United States

<sup>2</sup> Chemical and Physical Biology Program, Vanderbilt University, Nashville, Tennessee, TN 37235, United States

<sup>3</sup> Department of Chemistry, Vanderbilt University, Nashville, Tennessee, TN 37235, United States

<sup>4</sup> Institute for Drug Discovery, Leipzig University Medical School, Leipzig, 04103, Germany

\* To whom correspondence should be addressed.

# these authors contributed equally

† Lead Contact

Corresponding authors:

Dr. Clara T. Schoeder

Institute for Drug Discovery, Leipzig University Medical Faculty, Liebigstr. 19, 04103 Leipzig, Germany Phone: +49 341 97-25756, Email: [clara.schoeder@medizin.uni-leipzig.de](mailto:clara.schoeder@medizin.uni-leipzig.de)

Jens Meiler, PhD

Department of Chemistry, Vanderbilt University, 21<sup>st</sup> Ave S, Nashville, TN 37235

and

Institute for Drug Discovery, Institute for Pharmacy, Leipzig University, Liebigstr. 19, 04103 Leipzig, Germany

Phone: +1 615 936 5662, Fax: +1 615 936 2211, Email: [jens.meiler@vanderbilt.edu](mailto:jens.meiler@vanderbilt.edu).

## Content

|                                                                                                   |     |
|---------------------------------------------------------------------------------------------------|-----|
| <b>Table S1: Pathogenic Deletion Mutations used for testing AlphaFold2-RosettaRelax protocol.</b> | S3  |
| <b>Figure S1. Sam Domain Deletion Mutant Structures</b>                                           | S4  |
| <b>Figure S2. Circular Dichroism Melting Curves</b>                                               | S5  |
| <b>Figure S3. Nanoscale Differential Scanning Fluorimetry</b>                                     | S7  |
| <b>Figure S4. Exemplary CSP plots for del2,51,69</b>                                              | S9  |
| <b>Figure S5. Predictions for Sam Domain, GFP and Ricin Deletion Mutants</b>                      | S10 |
| <b>Figure S6: Pathogenic deletion side-chain weighted contact number</b>                          | S12 |
| <b>Figure S7: Computational protocols</b>                                                         | S13 |
| <b>Methods S1: Computational protocol captures</b>                                                | S14 |
| <b>References</b>                                                                                 | S28 |

**Table S1: Pathogenic Deletion Mutations used for testing AlphaFold2-RosettaRelax protocol, related to Figure 6.**

| <b>Protein</b>                                    | <b>UniProt</b> | <b>PDB</b> | <b>Deletion</b> | <b>Rosetta Pose #</b> |
|---------------------------------------------------|----------------|------------|-----------------|-----------------------|
| Phenylalanine-4-hydroxylase                       | P00439         | 1J8U       | L194            | L77                   |
|                                                   |                |            | L197            | L80                   |
|                                                   |                |            | Y198            | Y81                   |
|                                                   |                |            | L364            | L247                  |
| Ornithine transcarbamylase                        | P00480         | 1EP9       | L82             | L48                   |
|                                                   |                |            | E309            | E275                  |
|                                                   |                |            | E272            | E238                  |
| Phosphoglycerate kinase 1                         | P00558         | 5NP8       | K191            | K187                  |
| Adenosine deaminase                               | P00813         | 3IAR       | E337            | E333                  |
| Thyroid hormone receptor beta                     | P10828         | 6KKB       | T337            | T120                  |
| Glycogen phosphorylase                            | P11217         | 1Z8D       | F709            | F693                  |
| Arylsulfatase A                                   | P15289         | 1AUK       | P137            | P119                  |
|                                                   |                |            | F398            | F380                  |
| Arylsulfatase B                                   | P15848         | 1FSU       | Y86             | Y45                   |
| Neutrophil cytosol factor 2                       | P19878         | 1HH8       | K58             | K57                   |
|                                                   |                |            | E96             | E95                   |
| Alanine--glyoxylate aminotransferase              | P21549         | 6RV0       | V139            | V134                  |
|                                                   |                |            | A296            | A291                  |
| Iduronate 2-sulfatase                             | P22304         | 5FQL       | R95             | R62                   |
|                                                   |                |            | S117            | S84                   |
|                                                   |                |            | T118            | T85                   |
| Ferrochelatase                                    | P22830         | 2QD4       | F417            | F353                  |
| CD40 ligand                                       | P29965         | 1ALY       | G227            | G112                  |
| acyl-CoA dehydrogenase                            | P49748         | 2UXW       | E130            | E62                   |
|                                                   |                |            | K278            | K210                  |
|                                                   |                |            | E381            | E313                  |
| Alpha-N-acetylglucosaminidase                     | P54802         | 4XWH       | F142            | F119                  |
| 60S ribosomal protein L11                         | P62913         | 4XXB       | E161            | E133                  |
| Inositol polyphosphate 5-phosphatase OCRL         | Q01968         | 3QIS       | V742            | V147                  |
| Unconventional myosin-VIIa                        | Q13402         | 5MV9       | F1962           | F247                  |
| Ribonucleoside-diphosphate reductase subunit M2 B | Q7LG56         | 4DJN       | E85             | E58                   |
| 4-hydroxy-2-oxoglutarate aldolase                 | Q86XE5         | 3S5O       | E315            | E283                  |
| Atypical kinase COQ8A                             | Q8NI60         | 4PED       | T584            | T327                  |
| Glutathione S-transferase omega-1                 | P78417         | 6PNM       | E155            | E153                  |

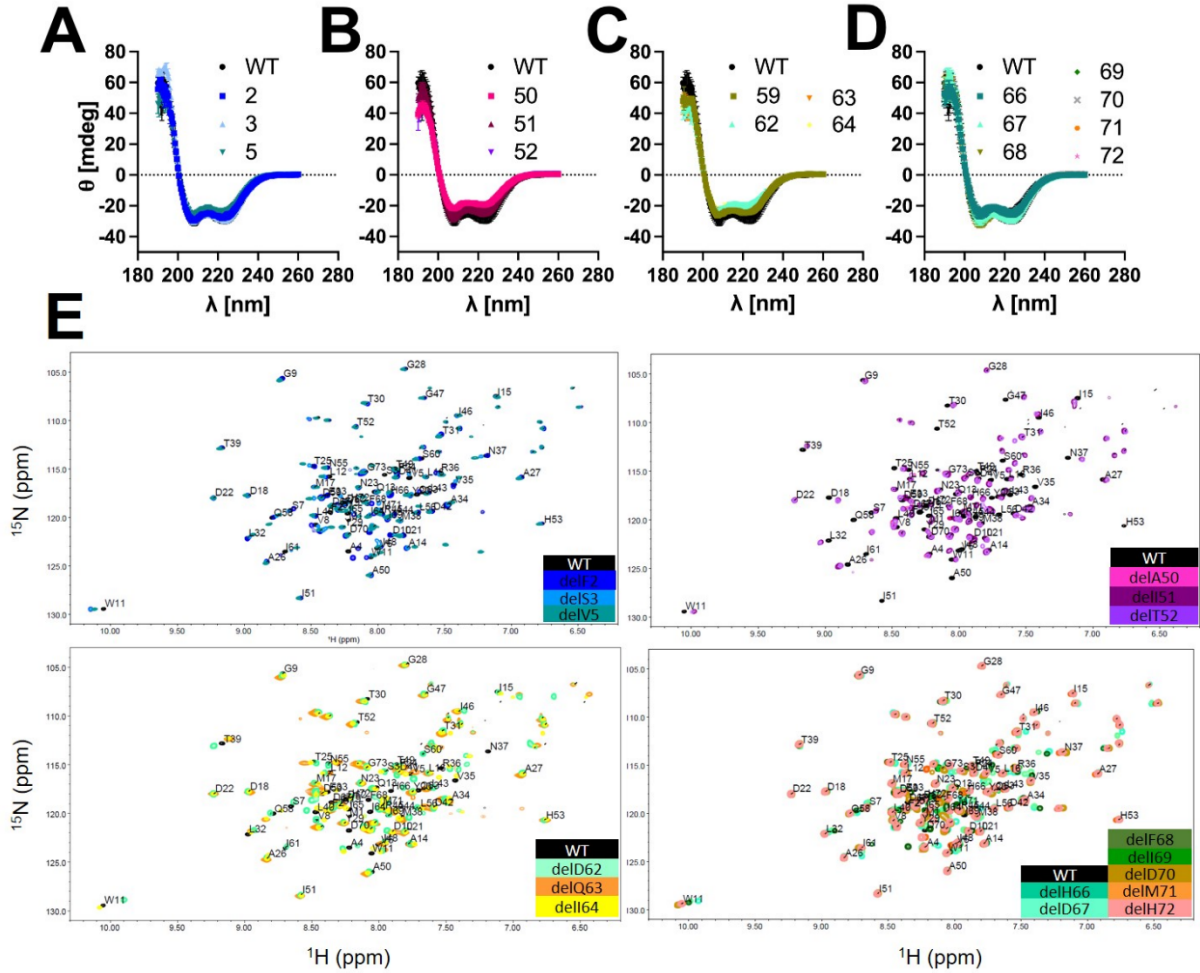

**Figure S1. Sam domain deletion mutant structures, related to Figure 1 and 2. A-D** Circular dichroism wavelength scans showing secondary structure of Sam domain mutants compared to WT shown in black. Scans for each mutant were averaged with standard deviation shown as error bars. **A.** N-terminal deletion mutants del 2, 3, 5, **B.** Loop IV deletion mutants del50-52, **C.** Helix V deletion mutants del59, 62-64 **D.** C-terminal deletion mutants del66-72 **E.** Overlay of the wildtype SAM domain and deletion mutants from 2D NMR spectroscopy. Amino acid are labeled for wildtype SAM domain peaks shown in black.

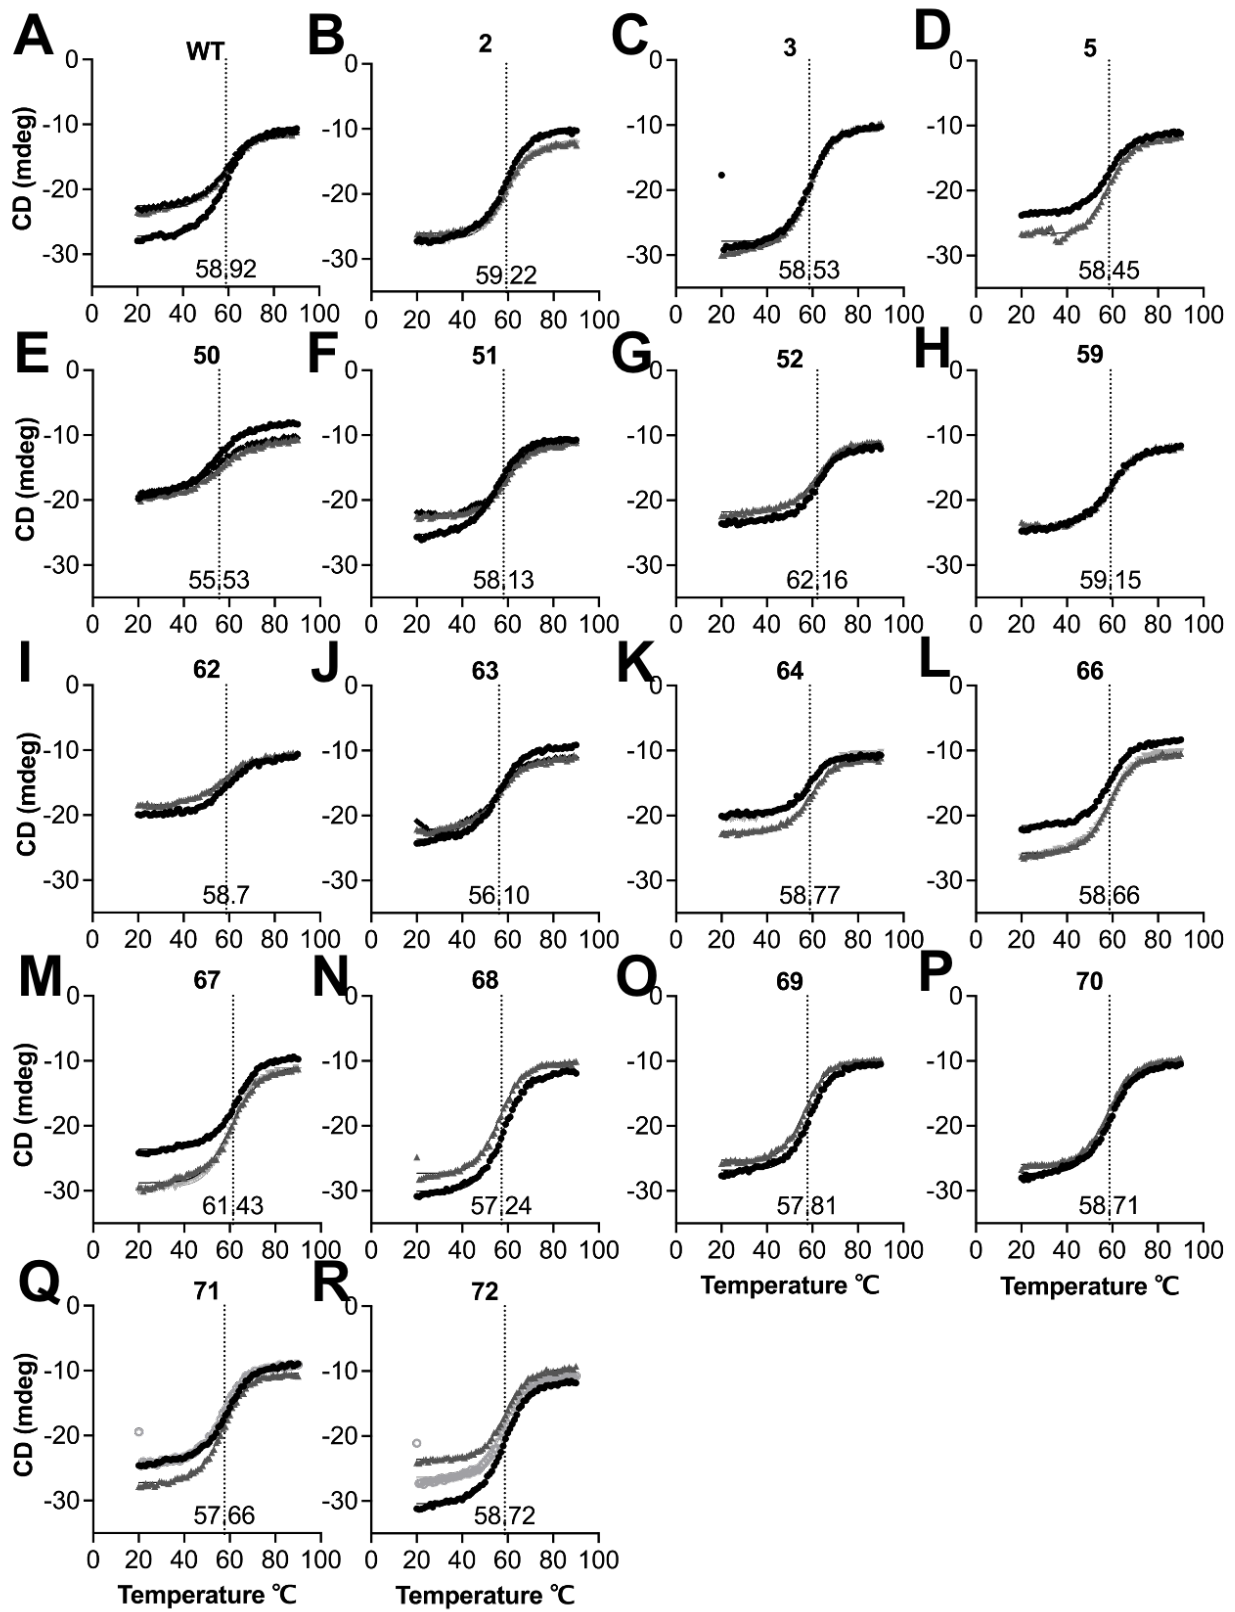

**Figure S2. Circular dichroism melting curves, related to Figure 1.** Melting curves for each SAM domain mutant measured at 222 nm wavelength which changes as  $\alpha$ -helical secondary structure is lost. The average melting temperature for each mutant is plotted with a dotted line. **A.** WT **B.** del2 **C.** del3 **D.** del5 **E.** del50 **F.** del51 **G.** del52 **H.** del59 **I.** del62 **J.** del63 **K.** del64 **L.** del66 **M.** del67 **N.** del68 **O.** del69 **P.** del70 **Q.** del71 **R.** del72

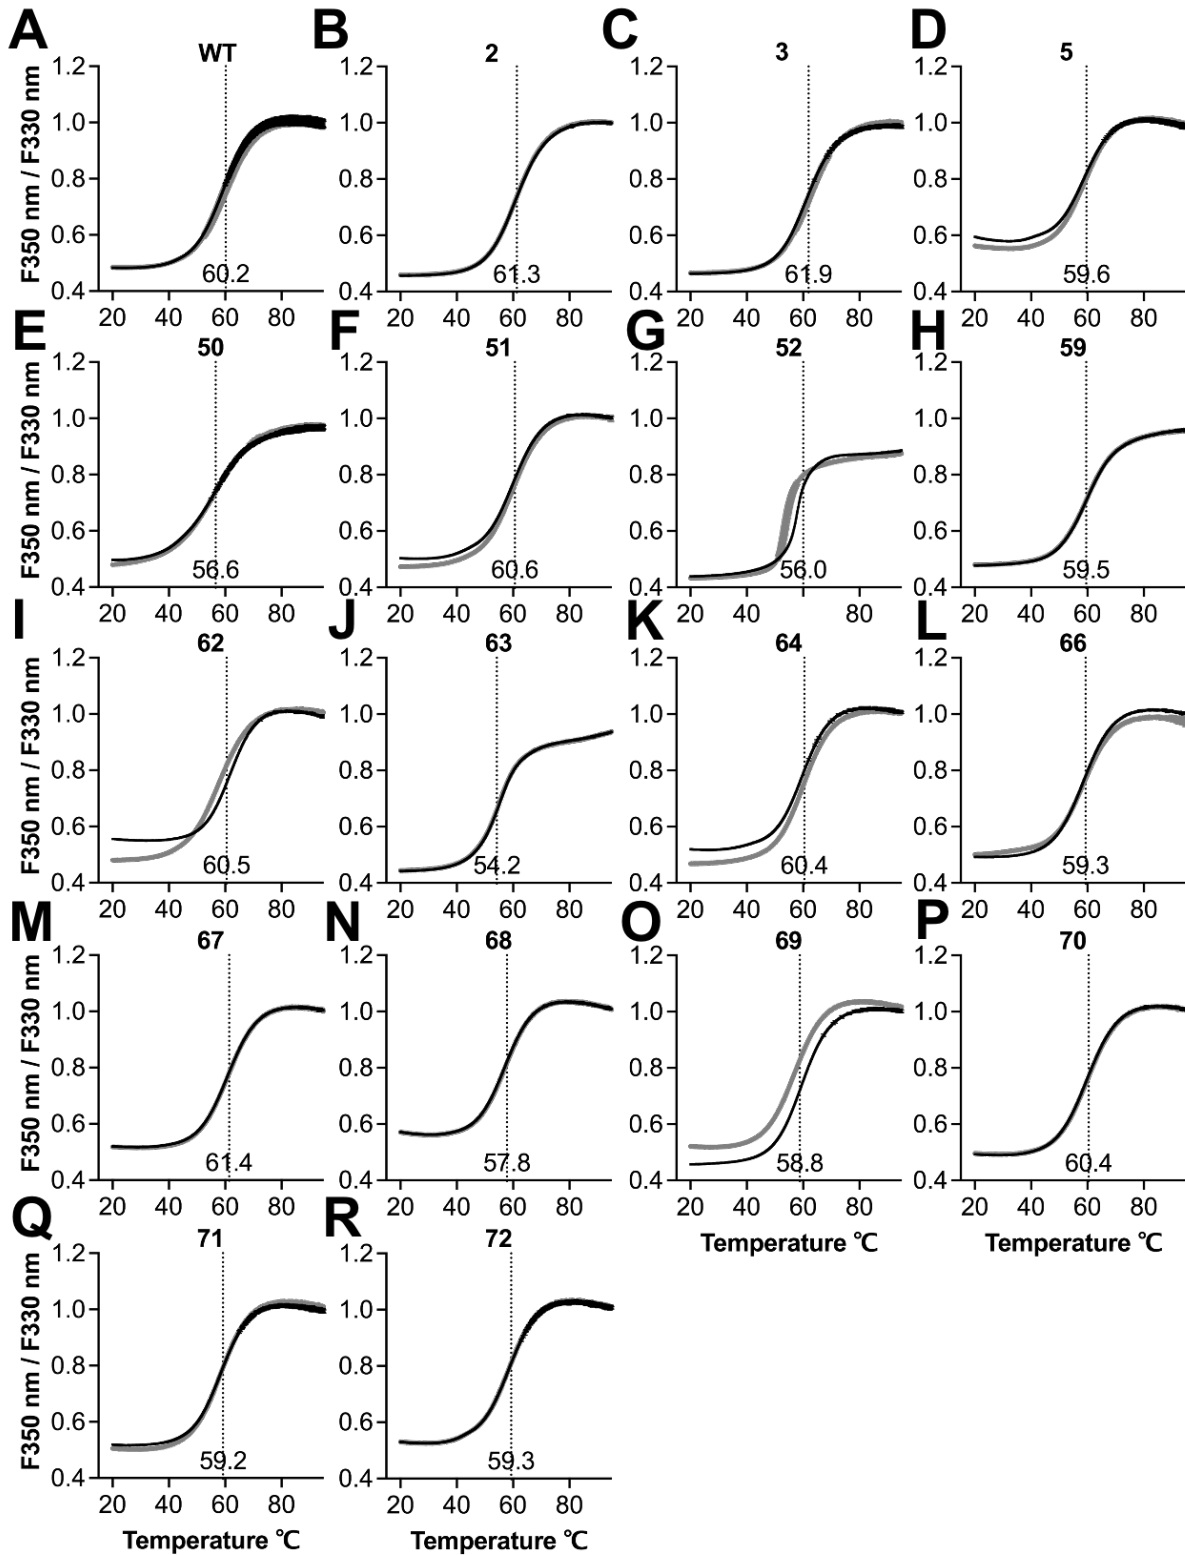

**Figure S3. Nanoscale differential scanning fluorimetry, related to Figure 1 and 3.** Melting curves for each SAM domain mutant done by measuring changes in the protein's intrinsic fluorescence. The average melting temperature for each mutant is plotted with a dotted line. **A.**

WT **B.** del2 **C.** del3 **D.** del5 **E.** del50 **F.** del51 **G.** del52 **H.** del59 **I.** del62 **J.** del63 **K.** del64 **L.**  
del66 **M.** del67 **N.** del68 **O.** del69 **P.** del70 **Q.** del71 **R.** del72





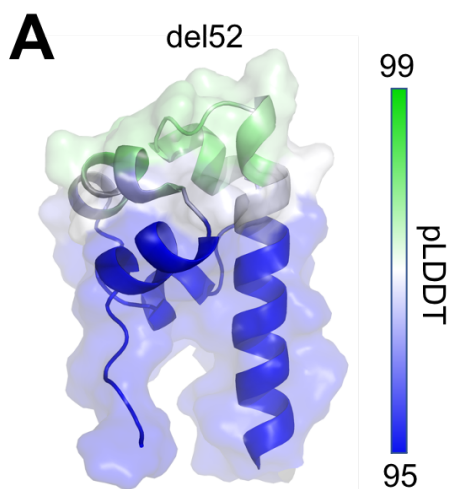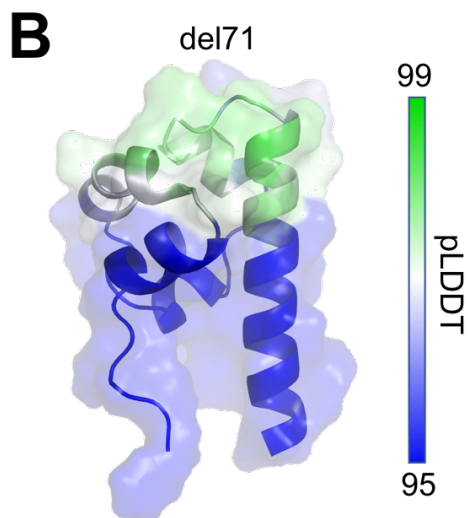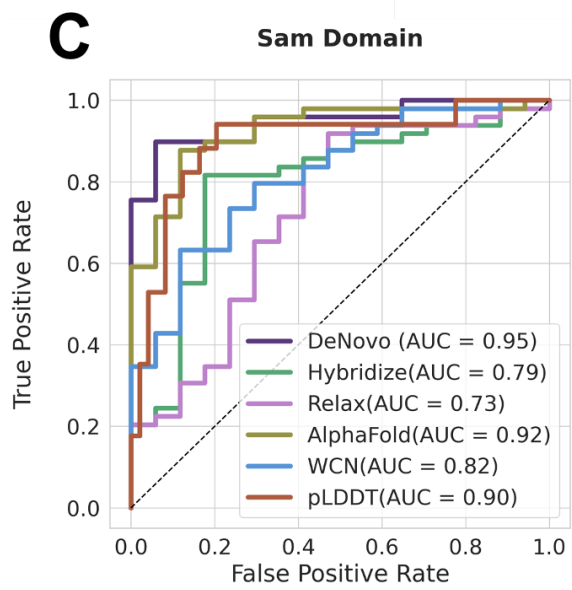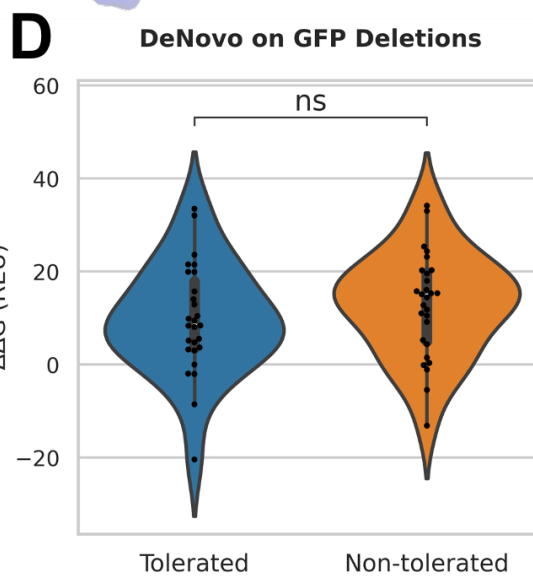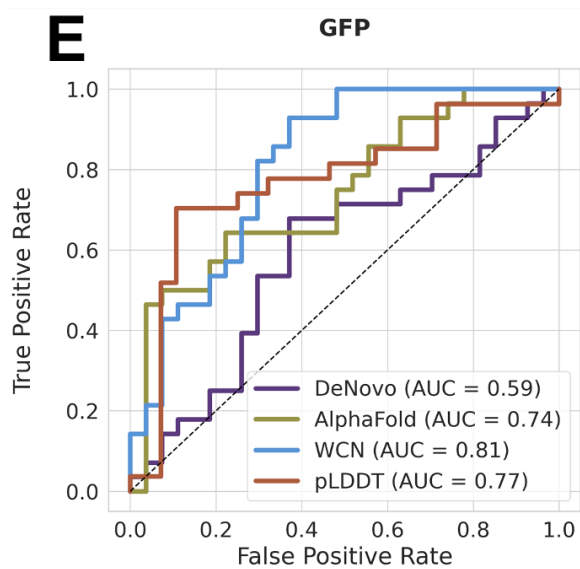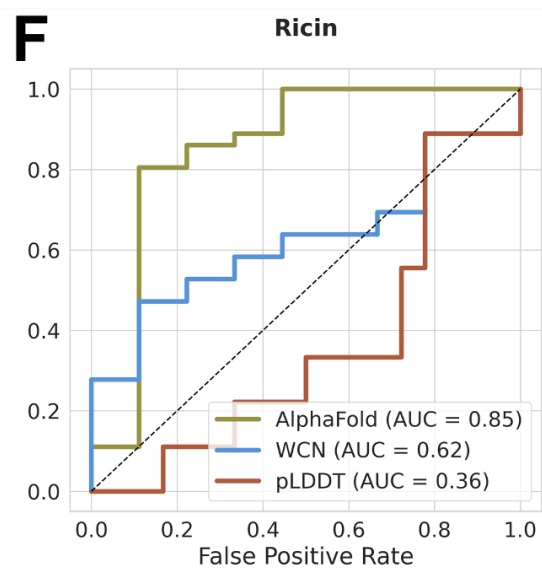

**Figure S5. Predictions for Sam Domain, GFP and Ricin deletion mutants, related to Figure 3 and 5.** **A.** Per-residue pLDDT from AlphaFold for deletion 52 mapped onto the lowest scoring structures from the AlphaFold protocol. **B.** for deletion 71. **C.** Receiver operating characteristic (ROC) curves for classifying SAM domain mutants as soluble or insoluble using  $\Delta\Delta G$  values from computational protocols DeNovo, Hybridize, Relax, and AlphaFold, predicted LDDT (pLDDT) values from AlphaFold output, and weighted contact number (WCN). Area under the curve (AUC) for each is shown in the legend. An AUC of 0.5 would be expected if classifications were done randomly. **D.** Distributions of scores from *de novo* protocol on GFP deletion tolerated and non-tolerated mutations were not found to be different based on Mann-Whitney test, p-value 0.24. **E.** ROC curves for classifying GFP mutants using  $\Delta\Delta G$  values from computational protocols DeNovo and AlphaFold, pLDDT from AlphaFold, and WCN. **F.** ROC curves for classifying Ricin mutants using  $\Delta\Delta G$  values from computational protocols DeNovo and AlphaFold, pLDDT from AlphaFold, and WCN.

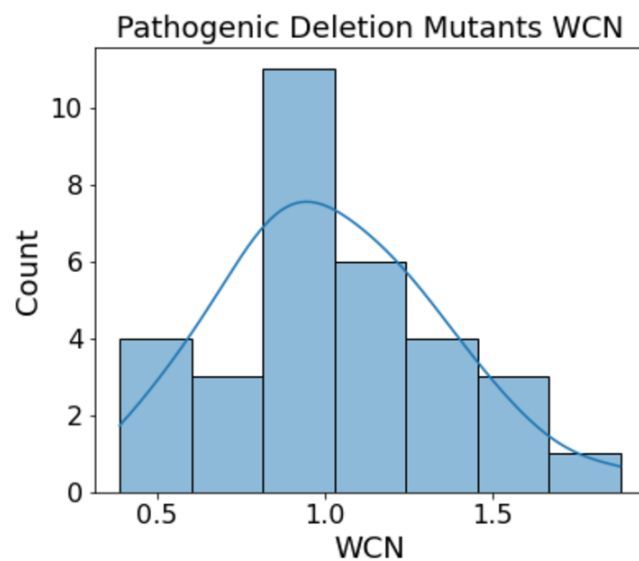

**Figure S6. Pathogenic deletion side-chain weighted contact number, related to Figure 6.** Distribution of side-chain weighted contact number of residues that result in pathogenic phenotypes when deleted from protein sequence.

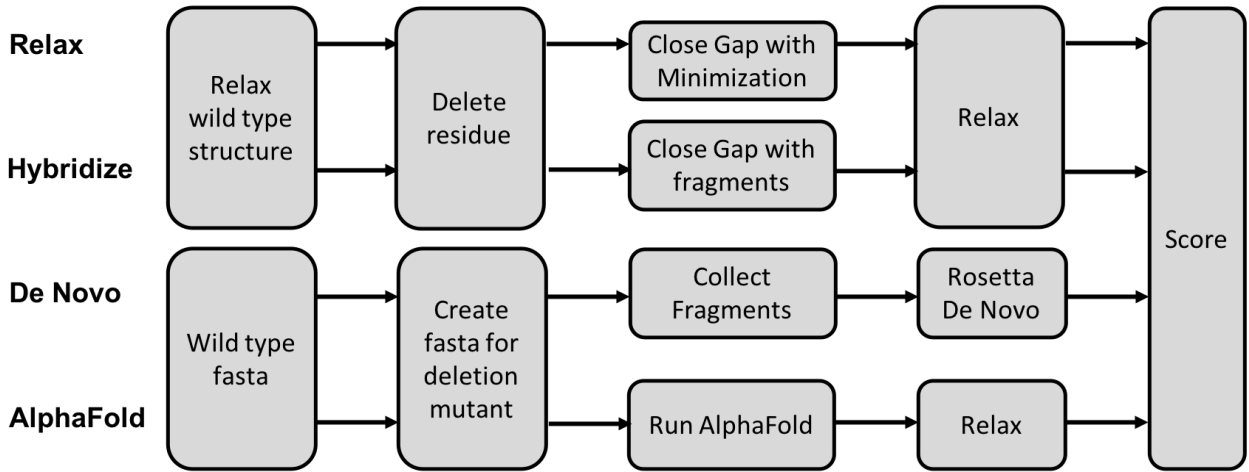

**Figure S7. Computational Protocols, related to STAR Methods:** Steps for each computational protocol tested on SAM domain deletion mutants.

## Methods S1. Computational Protocol captures, related to STAR Methods

The following steps were followed for each protocol listed in figure S2. Example command lines and scripts are shown for deletion 52 in SAM domain. Both the deletion and wildtype structure were modeled for each protocol to produce scores that are easily comparable. Rosetta release version 3.13 was used for all Rosetta based modeling and scoring. All AlphaFold models were created with version 2.2.0 [S1]. If command lines for steps were shown previously, the step is listed without a command line.

### Modeling of deletion mutants using AlphaFold

#### Wildtype:

Obtain fasta from PDB file with clean pdb

```
/Path/To/Rosetta/main/tools/protein_tools/scripts/clean_pdb.py  
1b0x2.pdb C
```

This will produce two files, a fasta file and a pdb file with all HETATM lines removed. For this example: 1b0x2\_C.fasta and 1b0x2\_C.pdb.

Run AlphaFold

```
python /sb/apps/alphafold220/alphafold/run_alphafold.py \  
--fasta_paths=1b0x2_C.fasta \  
--data_dir=$AF2_DATADIR \  
--output_dir=$CALCDIR \  
--max_template_date=9999-12-31 \  
--use_gpu_relax \  
--uniref90_database_path=$AF2_DATADIR/uniref90/uniref90.fasta \  
--mgnify_database_path=$AF2_DATADIR/mgnify/mgy_clusters.fa \  
--  
uniclust30_database_path=$AF2_DATADIR/uniclust30/uniclust30_2018  
_08/uniclust30_2018_08 \  
--  
bfd_database_path=$AF2_DATADIR/bfd/bfd_metaclust_clu_complete_id  
30_c90_final_seq.sorted_opt \  
--pdb70_database_path=$AF2_DATADIR/pdb70/pdb70 \  
--template_mmcif_dir=$AF2_DATADIR/pdb_mmcif/mmcif_files \  
--obsolete_pdbs_path=$AF2_DATADIR/pdb_mmcif/obsolete.dat \  
--model_preset=monomer
```

Run Rosetta Relax

```
ls ranked_?.pdb > wt_models.list  
  
/Path/To/Rosetta/main/source/bin/relax.default.linuxgccrelease -  
in:file:1 wt_models.list -relax:constrain_relax_to_start_coords  
1 -nstruct 10 -out:file:silent af_wt.out -out:file:scorefile  
af_wt.sc > af_wt.log
```

#### Mutant:

Create fasta file from PDB

```
cat 1b0x2_C.fasta | sed -n '2 p' | sed "s/./52" >>
1b0x_del52.fasta
```

### Run AlphaFold

```
python /sb/apps/alphafold220/alphafold/run_alphafold.py \
--fasta_paths=1b0x_del52.fasta \
--data_dir=$AF2_DATADIR \
--output_dir=YOUR/WORKING/DIRECTORY \
--max_template_date=9999-12-31 \
--use_gpu_relax \
--uniref90_database_path=$AF2_DATADIR/uniref90/uniref90.fasta \
--mgnify_database_path=$AF2_DATADIR/mgnify/mgy_clusters.fa \
--
uniclust30_database_path=$AF2_DATADIR/uniclust30/uniclust30_2018
_08/uniclust30_2018_08 \
--
bfd_database_path=$AF2_DATADIR/bfd/bfd_metaclust_clu_complete_id
30_c90_final_seq.sorted_opt \
--pdb70_database_path=$AF2_DATADIR/pdb70/pdb70 \
--template_mmcif_dir=$AF2_DATADIR/pdb_mmcif/mmcif_files \
--obsolete_pdbs_path=$AF2_DATADIR/pdb_mmcif/obsolete.dat \
--model_preset=monomer
```

### Run Rosetta Relax

```
ls ranked_?.pdb > del52_models.list

/Path/To/Rosetta/main/source/bin/relax.default.linuxgccrelease -
in:file:1 del52_models.list -
relax:constrain_relax_to_start_coords 1 -nstruct 10 -
out:file:silent af_del52.out -out:file:scorefile af_del52.sc >
af_del52.log
```

pLDDT values were taken from ranking\_debug.json. The pLDDT values reported here is the pLDDT averaged across all residues. Scores from the lowest three scoring models produced from the Rosetta Relax were averaged together to obtain a final score for the model.

### Modeling of deletion mutants using *de novo* folding

#### Wildtype:

Obtain fasta file

Create sequence profile and secondary structure prediction files for picking fragments. Details can be found at

[https://www.rosettacommons.org/docs/latest/application\\_documentation/utilities/app-fragment-picker](https://www.rosettacommons.org/docs/latest/application_documentation/utilities/app-fragment-picker) or /Path/To/Rosetta/main/tools/fragment\_tools/fragments.README.

```
fragmentpicker_runss 1b0x2_C.fasta
```

```
fragment_picker_quota.options
```

```

#input databases
-in::file::vall /dors/meilerlab/apps/rosetta/rosetta-
3.13/main/tools/fragment_tools/vall.jul19.2011.gz #constant

#query-related input files
-in::file::checkpoint 1b0x2_C.checkpoint #need to update
-in::file::fasta 1b0x2_C.fasta #need to update
-frags::ss_pred 1b0x2_C.psipred_ss2 psipred 1b0x2_C.jufo9d_ss
jufo #need to update

#the name root for the output fragment files
-out::file::frag_prefix wt-frags #need to update

#show score components for each selected fragment
-frags::describe_fragments wt-frags.fsc #need to update

#weights
-frags::scoring::config ../fragment_picker_quota.wghts #constant

#we need 9-mers and 3-mers
-frags::frag_sizes 9 3 #constant

#select 200 fragments from 1000 candidates. we need more
candidates than fragments to fill quota pools
-frags::n_candidates 1000 #constant
-frags::n_fragments 200 #constant

#quota.def file defines the shares between different quota
pools. the total should be 1.0
-frags::picking::quota_config_file ../fragment_picker_quota.cfg
#constant

```

#### fragment picker quota.weights

| #score              | name | priority | weight | min_allowed | extras  |
|---------------------|------|----------|--------|-------------|---------|
| SecondarySimilarity |      | 350      | 0.5    | -           | psipred |
| SecondarySimilarity |      | 250      | 0.5    | -           | jufo    |
| RamaScore           |      | 150      | 1.0    | -           | psipred |
| RamaScore           |      | 150      | 1.0    | -           | jufo    |
| ProfileScoreL1      |      | 200      | 1.0    | -           |         |

#### fragment picker\_quota.cfg

| #pool_id | pool_name | fraction |
|----------|-----------|----------|
| 1        | psipred   | 0.6      |
| 2        | jufo      | 0.4      |

Pick fragments



```
/Path/To/Rosetta/main/source/bin/fragment_picker.linuxgccrelease
@ fragment_picker_quota.options
```

This will produce fragment files wt-frags.200.3mers, wt-frags.200.9mers, wt-frags.200.3mers, wt-frags.fsc.200.3mers, wt-frags.fsc.200.9mers

#### del broker.options

```
# Make sure all variable names have been replaced with absolute
path and that no line begins with a $ or ~s
-in
    -file
        -fasta 1b0x2_C.fasta      # protein sequence in
fasta format
        -frag3 wt-frags.200.3mers
        -frag9 wt-frags.200.9mers
-abinitio
    -increase_cycles 10          # Increase the number of cycles
at each stage in AbinitioRelax by this factor
    -rg_reweight 0.5            # Reweight contribution of
radius of gyration to total score by this scale factor
    -rsd_wt_helix 0.5          # Reweight env, pair, and cb
scores for helix residues by this factor
    -rsd_wt_loop 0.5           # Reweight env, pair, and cb
scores for loop residues by this factor
    -relax
-relax
    -fast      # At the end of the de novo protein_folding, do
a relax step of type "FastRelax". This has been shown to be the
best deal for speed and robustness.
-broker
    -setup del_topology_broker.tpb
-run
    -protocol broker
    -reinitialize_mover_for_each_job # jd generate fresh
copy of its mover before each apply (once per job)
-score
    -find_neighbors_3dgrid # Use a 3D lookup table for
doing neighbor calculations. For spherical, well-distributed
conformations
-out
    -nstruct 1000              # how many structures do you want to
generate? Usually want to fold at least 1,000.
    -file
        -silent 1b0x2_C_broker.out      # full path to
silent file output
        -silent_struct_type binary      # we want binary
silent files
```

```
-scorefile 1b0x2_C_broker.sc
-overwrite      # overwrite any existing output with the same
name you may have generated
```

### Run Rosetta DeNovo

```
/Path/To/Rosetta/main/source/bin/AbinitioRelax.default.linuxgccr
elease @ del_broker.options -out:file:silent
1b0x2_C_wt_broker.out -out:file:scorefile 1b0x2_C_wt_broker.sc >
1b0x2_C_wt.log
```

### Mutant:

Obtain fasta file

Setup for fragment picker

```
/dors/meilerlab/apps/scripts/rosetta_tools/fragmentpicker_runss
1b0x2_C_del152.fasta
```

### fragment\_picker\_quota.options

```
#input databases
-in::file::vall /dors/meilerlab/apps/rosetta/rosetta-
3.13/main/tools/fragment_tools/vall.jul19.2011.gz #constant

#query-related input files
-in::file::checkpoint 1b0x2_C_del152.checkpoint #need to update
-in::file::fasta 1b0x2_C_del152.fasta #need to update
-frags::ss_pred 1b0x2_C_del152.psipred_ss2 psipred
1b0x2_C_del152.jufo9d_ss jufo #need to update

#the name root for the output fragment files
-out::file::frag_prefix del152-frags #need to update

#show score components for each selected fragment
-frags::describe_fragments del152-frags.fsc #need to update

#weights
-frags::scoring::config ../fragment_picker_quota.wghts #constant

#we need 9-mers and 3-mers
-frags::frag_sizes 9 3 #constant

#select 200 fragments from 1000 candidates. we need more
candidates than fragments to fill quota pools
-frags::n_candidates 1000 #constant
-frags::n_fragments 200 #constant

#quota.def file defines the shares between different quota
pools. the total should be 1.0
```

```
-frags::picking::quota_config_file ../fragment_picker_quota.cfg
#constant
```

#### fragment\_picker\_quota.weights

| #score              | name | priority | weight | min_allowed | extras  |
|---------------------|------|----------|--------|-------------|---------|
| SecondarySimilarity |      | 350      | 0.5    | -           | psipred |
| SecondarySimilarity |      | 250      | 0.5    | -           | jufo    |
| RamaScore           |      | 150      | 1.0    | -           | psipred |
| RamaScore           |      | 150      | 1.0    | -           | jufo    |
| ProfileScoreL1      |      | 200      | 1.0    | -           |         |

#### fragment\_picker\_quota.cfg

| #pool_id | pool_name | fraction |
|----------|-----------|----------|
| 1        | psipred   | 0.6      |
| 2        | jufo      | 0.4      |

#### Pick fragments

```
/Path/To/Rosetta/main/source/bin/fragment_picker.linuxgccrelease
@ fragment_picker_quota.options
```

This will produce fragment files del52-frags.200.3mers, del52-frags.200.9mers, del52-frags.200.3mers, del52-frags.fsc.200.3mers, del52-frags.fsc.200.9mers

#### del\_broker.options

```
# Make sure all variable names have been replaced with absolute
path and that no line begins with a $ or ~s
-in
    -file
        -fasta lb0x2_C_del52.fasta      # protein sequence
in fasta format
    -frag3 del52-frags.200.3mers
    -frag9 del52-frags.200.9mers
-abinitio
    -increase_cycles 10      # Increase the number of cycles
at each stage in AbinitioRelax by this factor
    -rg_reweight 0.5        # Reweight contribution of
radius of gyration to total score by this scale factor
    -rsd_wt_helix 0.5       # Reweight env, pair, and cb
scores for helix residues by this factor
    -rsd_wt_loop 0.5        # Reweight env, pair, and cb
scores for loop residues by this factor
-relax
-relax
    -fast      # At the end of the de novo protein_folding, do
a relax step of type "FastRelax". This has been shown to be the
best deal for speed and robustness.
```

```

-broker
    -setup del_topology_broker.tpb
-run
    -protocol broker
    -reinitialize_mover_for_each_job # jd generate fresh
copy of its mover before each apply (once per job)
-score
    -find_neighbors_3dgrid # Use a 3D lookup table for
doing neighbor calculations. For spherical, well-distributed
conformations
-out
    -nstruct 1000 # how many structures do you want to
generate? Usually want to fold at least 1,000.
    -file
        -silent 1b0x2_C_del52_broker.out # full
path to silent file output
        -silent_struct_type binary # we want binary
silent files
        -scorefile 1b0x2_C_del52_broker.sc
-overwrite # overwrite any existing output with the same
name you may have generated

```

### Run Rosetta DeNovo

```

/Path/To/Rosetta/main/source/bin/AbinitioRelax.default.linuxgccr
elease @ del_broker.options -out:file:silent
1b0x2_C_del52_broker.out -out:file:scorefile
1b0x2_C_del52_broker.sc > 1b0x2_C_del52.log

```

Scores from the lowest three scoring models were averaged to obtain the final score for each deletion and wildtype.

### Modeling of deletion mutants using RosettaRelax

#### Clean PDB

```

/Path/To/Rosetta/main/tools/protein_tools/scripts/clean_pdb.py
1b0x2.pdb C

```

#### Run prep relax

```

/Path/To/Rosetta/main/source/bin/relax.default.linuxgccrelease -
in:file:s 1b0x2_C.pdb -nstruct 100 -relax:fast -
relax:constrain_relax_to_start_coords -out:file:scorefile
1b0x2_C.sc

```

Save lowest scoring model from prep relax to be used as starting structure for next step, in this case saved as 1b0x2\_C\_relaxed.

#### Wildtype:

```
delete_relax_wt.xml
```

```
<ROSETTASCRIPTS>
```

```

<TASKOPERATIONS>
</TASKOPERATIONS>
<SCOREFXNS>
  <ScoreFunction name="ref2015_cart" weights="ref2015_cart"/>
  <ScoreFunction name="ref2015" weights="ref2015"/>
</SCOREFXNS>
<FILTERS>
</FILTERS>
<RESIDUE_SELECTORS>
  Index name="deletion" resnums="%%del_pos%%"/>
</RESIDUE_SELECTORS>
<TASKOPERATIONS>
  <InitializeFromCommandline name="commandline_init"/>
  <RestrictToRepacking name="restrict_to_repacking"/>
</TASKOPERATIONS>
<MOVERS>
  DeleteRegionMover name="delete"
residue_selector="deletion" rechain="false"/>
  <FastRelax name="relax" scorefxn="ref2015_cart" repeats="1"
dualspace="1" bondangle="1"/>
  <MinMover name="minimize" type="lbfgs_armijo_nonmonotone"
cartesian="1" bondlength="1" bondangle="1" chi="1" bb="1"
scorefxn="ref2015_cart"/>
</MOVERS>
<APPLY_TO_POSE>
</APPLY_TO_POSE>
<PROTOCOLS>
  Add mover="delete"/>
  <Add mover="minimize"/>
  <Add mover="relax"/>
</PROTOCOLS>
<OUTPUT scorefxn="ref2015"/>
</ROSETTASCRIPTS>

```

#### Run delete\_relax\_wt rosetta script

```

/Path/To/Rosetta/main/source/bin/rosetta_scripts.default.linuxgc
crelease -parser:protocol ./delete_and_relax_wt.xml -in:file:s
1b0x2_C_relaxed.pdb -out:file:silent 1b0x2_relax.out -
out:file:scorefile 1b0x2_relax.sc -nstruct 100 > 1b0x2_relax.log

```

#### Mutant:

#### delete\_relax.xml

```

<ROSETTASCRIPTS>
  <TASKOPERATIONS>
  </TASKOPERATIONS>
  <SCOREFXNS>
    <ScoreFunction name="ref2015_cart" weights="ref2015_cart"/>
    <ScoreFunction name="ref2015" weights="ref2015"/>
  </SCOREFXNS>

```

```

<FILTERS>
</FILTERS>
<RESIDUE_SELECTORS>
  <Index name="deletion" resnums="%%del_pos%%"/>
</RESIDUE_SELECTORS>
<TASKOPERATIONS>
  <InitializeFromCommandline name="commandline_init"/>
  <RestrictToRepacking name="restrict_to_repacking"/>
</TASKOPERATIONS>
<MOVERS>
  <DeleteRegionMover name="delete"
residue_selector="deletion" rechain="false"/>
  <FastRelax name="relax" scorefxn="ref2015_cart" repeats="1"
dualspace="1" bondangle="1"/>
  <MinMover name="minimize" type="lbfgs_armijo_nonmonotone"
cartesian="1" bondlength="1" bondangle="1" chi="1" bb="1"
scorefxn="ref2015_cart"/>
</MOVERS>
<APPLY_TO_POSE>
</APPLY_TO_POSE>
<PROTOCOLS>
  <Add mover="delete"/>
  <Add mover="minimize"/>
  <Add mover="relax"/>
</PROTOCOLS>
  <OUTPUT scorefxn="ref2015"/>
</ROSETTASCRIPTS>

```

#### Run delete relax rosetta script

```

/Path/To/Rosetta/main/source/bin/rosetta_scripts.default.linuxgc
crelease -parser:protocol -parser:protocol
./delete_and_relax.xml -parser:script_vars del_pos=52 -in:file:s
../../1b0x2_C_relaxed.pdb -out:file:silent 1b0x2_del52_relax.out
-out:file:scorefile 1b0x2_del52_relax.sc -nstruct 100

```

Scores from the lowest three scoring models were averaged to obtain the final score for each deletion and wildtype.

### Modeling of deletion mutants using Rosetta Hybridize

Clean pdb

Run prep relax

Save lowest scoring model from prep relax to be used as starting structure for next step, in this case saved as 1b0x2\_C\_relaxed

Wildtype:

Note that the hybridize protocol does fragment insertion sampling based locally around where the deletion is, therefore, to have comparable scores each deletion has a corresponding wild type run where the sampling is done on the same set of residues for both mutant and wildtype. The below command lines will be specific for deletion 52.

## delete\_segment\_hybridize\_wt.xml

```
<ROSETTASCRIPTS>
  <TASKOPERATIONS>
  </TASKOPERATIONS>
  <SCOREFXNS>
    <ScoreFunction name="ref2015_cart" weights="ref2015_cart"/>
    <ScoreFunction name="ref2015" weights="ref2015"/>
  </SCOREFXNS>
  <FILTERS>
  </FILTERS>
  <RESIDUE_SELECTORS>
    Index name="deletion" resnums="%%del_pos%%"/>
  </RESIDUE_SELECTORS>
  <TASKOPERATIONS>
    <InitializeFromCommandline name="commandline_init"/>
    <RestrictToRepacking name="restrict_to_repacking"/>
  </TASKOPERATIONS>
  <MOVERS>
    DeleteRegionMover name="delete"
residue_selector="deletion" rechain="false"/>
    <SegmentHybridizer name="segment_hybridize" frag_big="5"
nfrags="200" rms_frags="0.5" use_frags="1" use_seq="1">
      <Span begin="%%start%%" end="%%stop%%"
extend_outside="3" extend_inside="1"/>
    </SegmentHybridizer>
    PrepareForFullatom name="fullatom"/>
    <SwitchResidueTypeSetMover name="fullatom"
set="fa_standard"/>
    <FastRelax name="relax" scorefxn="ref2015_cart" repeats="1"
dualspace="1" bondangle="1"/>
    <MinMover name="minimize" type="lbfgs_armijo_nonmonotone"
cartesian="1" bondlength="1" bondangle="1" chi="1" bb="1"
scorefxn="ref2015_cart"/>
    <ClearConstraintsMover name="clearconstraints"/>
  </MOVERS>
  <APPLY_TO_POSE>
  </APPLY_TO_POSE>
  <PROTOCOLS>
    Add mover="delete"/>
    <Add mover="segment_hybridize"/>
    <Add mover="fullatom"/>
    Add mover="minimize"/>
    <Add mover="relax"/>
  </PROTOCOLS>
  <OUTPUT scorefxn="ref2015"/>

```

Run delete\_segment\_hybridize\_wt rosetta script

```
/Path/To/Rosetta/main/source/bin/rosetta_scripts.default.linuxgc
crelease -parser:protocol ./delete_segment_hybridize_wt.xml -
parser:script_vars del_pos=52 start=42 stop=62 -in:file:s
1b0x2_C_relaxed.pdb -out:file:silent 1b0x2_wt52_seggyb.out -
out:file:scorefile 1b0x2_wt52_seggyb.sc -nstruct 100
```

**Mutant:**

**delete\_segment\_hybridize.xml**

```
<ROSETTASCRIPITS>
  <TASKOPERATIONS>
  </TASKOPERATIONS>
  <SCOREFXNS>
    <ScoreFunction name="ref2015_cart" weights="ref2015_cart"/>
    <ScoreFunction name="ref2015" weights="ref2015"/>
  </SCOREFXNS>
  <FILTERS>
  </FILTERS>
  <RESIDUE_SELECTORS>
    <Index name="deletion" resnums="%%del_pos%%"/>
  </RESIDUE_SELECTORS>
  <TASKOPERATIONS>
    <InitializeFromCommandline name="commandline_init"/>
    <RestrictToRepacking name="restrict_to_repacking"/>
  </TASKOPERATIONS>
  <MOVERS>
    <DeleteRegionMover name="delete"
residue_selector="deletion" rechain="false"/>
    <SegmentHybridizer name="segment_hybridize" frag_big="5"
nfrags="200" rms_frgs="0.5" use_frgs="1" use_seq="1">
      <Span begin="%%start%%" end="%%stop%%"
extend_outside="3" extend_inside="1"/>
    </SegmentHybridizer>
    <PrepareForFullatom name="fullatom"/>
    <SwitchResidueTypeSetMover name="fullatom"
set="fa_standard"/>
    <FastRelax name="relax" scorefxn="ref2015_cart" repeats="1"
dualspace="1" bondangle="1"/>
    <MinMover name="minimize" type="lbfgs_armijo_nonmonotone"
cartesian="1" bondlength="1" bondangle="1" chi="1" bb="1"
scorefxn="ref2015_cart"/>
    <ClearConstraintsMover name="clearconstraints"/>
  </MOVERS>
  <APPLY_TO_POSE>
  </APPLY_TO_POSE>
  <PROTOCOLS>
    <Add mover="delete"/>
    <Add mover="segment_hybridize"/>
    <Add mover="fullatom"/>
```



```
    Add mover="minimize"/>
    <Add mover="relax"/>
  </PROTOCOLS>
  <OUTPUT scorefxn="ref2015"/>
</ROSETTASCRIPTS>
```

#### Run delete segment hybridize rosetta script

```
/Path/To/Rosetta/main/source/bin/rosetta_scripts.default.linuxgccrelease -parser:protocol ./delete_segment_hybridize.xml -
parser:script_vars del_pos=52 start=42 stop=62 -in:file:s
1b0x2_C_relaxed.pdb -out:file:silent 1b0x2_del52_seghyb.out -
out:file:scorefile 1b0x2_del52_seghyb.sc -nstruct 100
```

Scores from the lowest three scoring models were averaged to obtain the final score for each deletion and wildtype.

#### Weighted Contact Number:

The below command line and script were used for calculating side-chain weighted contact number (WCN), as described by Marcos and Echave [S2,S3]. The script requires the installation of PyRosetta; directions can be found here: <https://www.pyrosetta.org/> [S4]. The calc\_wcn.py script was ran with PyRosetta version: PyRosetta4.Release.python37.linux.

#### Command line:

```
python calc_wcn.py 1b0x2_C.pdb 1b0x_wcn.csv
```

#### calc\_wcn.py

```
import os,sys
import numpy as np
from math import log,sqrt
from pyrosetta import *

init()

#script for calculating side-chain weighted contact number (WCN)

#first argument should be the pdb file
#second argument should be the name of the output file you want
to write the WCN in
#output file is a csv file, the first column being the residue
number and the second the WCN for that residue

pdb_file = sys.argv[1]
output_file = sys.argv[2]

pose = pose_from_pdb(pdb_file)

nres = pose.total_residue()
```

```

#create array of coordinates
sc_centers = []

#loop through residues
for resn in range(1,nres+1):
    residue = pose.residue(resn)
    center = []

    #if glycine, keep Calpha coordinate
    if ( residue.name() == "GLY" or residue.name() ==
"GLY:NtermProteinFull" or residue.name() ==
"GLY:CtermProteinFull"):
        center = np.array([residue.xyz(2).x, residue.xyz(2).y,
residue.xyz(2).z]) #Calpha
    else:
        n_heavy_atoms = residue.nheavyatoms()
        atom_coordinates = []
        #only loop through atoms starting at 5 because first 4
are backbone heavy atoms
        for atom in range(5,n_heavy_atoms+1):
            #collect heavy atom side chain coordinates
            atom_coordinates.append(residue.xyz(atom))

        #calculate geometric center
        center = np.sum(atom_coordinates,
axis=0)/(n_heavy_atoms - 4)

        sc_centers.append(center)

#initiate wcn array, length nres
wcn = []

with open( output_file, 'w') as f:

    f.write("position,wcn\n")

#loop through array
for i in range(0,nres):
    wcn_i = 0
    center_i = sc_centers[i]
    #loop through array again
    for j in range(0,nres):
        if( i != j ):
            center_j = sc_centers[j]

```

```

                                #calculate distance between each residue sc
geometric center                sum_sq = np.sum(np.square(center_i -
center_j))                       r = np.sqrt(sum_sq)
                                #sum r^(-2)
                                wcn_i += r**(-2)
                                wcn.append(wcn_i)
                                #with open( output_file, 'w') as f:
                                f.write("%i,%f\n" %(i+1, wcn_i))
```

## References

- S1. Jumper, J., Evans, R., Pritzel, A., Green, T., Figurnov, M., Ronneberger, O., Tunyasuvunakool, K., Bates, R., Zidek, A., Potapenko, A., et al. (2021). Highly accurate protein structure prediction with AlphaFold. *Nature* 596, 583-589. 10.1038/s41586-021-03819-2.
- S2. Marcos, M.L., and Echave, J. (2015). Too packed to change: side-chain packing and site-specific substitution rates in protein evolution. *PeerJ* 3, e911. 10.7717/peerj.911.
- S3. Jackson, E.L., Spielman, S.J., and Wilke, C.O. (2017). Computational prediction of the tolerance to amino-acid deletion in green-fluorescent protein. *Plos One* 12, e0164905. 10.1371/journal.pone.0164905.
- S4. Chaudhury, S., Lyskov, S., and Gray, J.J. (2010). PyRosetta: a script-based interface for implementing molecular modeling algorithms using Rosetta. *Bioinformatics* 26, 689-691. 10.1093/bioinformatics/btq007.
